# Supplementary material
Source: publisher figshare collection journal article supplement (https://karger.figshare.com/ndownloader/files/27670962)
Supplement: Supplementary file 1 [file 27670962]

**Tab. S2**: 144 metabolites used for further analysis after the process of data cleaning.

| **Amino Acids and Biogenic Amines** | | | | |
| --- | --- | --- | --- | --- |
| Ala | Arg | Asn | Cit | Gln |
| Glu | Gly | His | Ile | Leu |
| Lys | Met | Orn | Phe | Pro |
| Ser | Thr | Trp | Tyr | Val |
| ADMA | alpha-AAA | Creatinine | Kynurenine | Putrescine |
| Sarcosine | SDMA | t4-OH-Pro | Taurine |  |
| **Acylcarnitines** | | | | |
| C0 | C2 | C3 | C3-DC (C4-OH) | C4 |
| C5 | C5-DC (C6-OH) | C6 (C4:1-DC) | C7-DC | C10 |
| C14 | C14:1 | C14:2 | C16 | C16:1 |
| C18 | C18:1 | C18:2 |  |  |
| **Glycerophospholipids** | | | | |
| lysoPC a C16:0 | lysoPC a C16:1 | lysoPC a C17:0 | lysoPC a C18:0 | lysoPC a C18:1 |
| lysoPC a C18:2 | lysoPC a C20:3 | lysoPC a C20:4 | lysoPC a C26:0 | lysoPC a C26:1 |
| lysoPC a C28:0 | lysoPC a C28:1 | PC aa C28:1 | PC aa C30:0 | PC aa C32:0 |
| PC aa C32:1 | PC aa C32:2 | PC aa C32:3 | PC aa C34:1 | PC aa C34:2 |
| PC aa C34:3 | PC aa C34:4 | PC aa C36:0 | PC aa C36:1 | PC aa C36:2 |
| PC aa C36:3 | PC aa C36:4 | PC aa C36:5 | PC aa C36:6 | PC aa C38:0 |
| PC aa C38:1 | PC aa C38:3 | PC aa C38:4 | PC aa C38:5 | PC aa C38:6 |
| PC aa C40:2 | PC aa C40:3 | PC aa C40:4 | PC aa C40:5 | PC aa C40:6 |
| PC aa C42:0 | PC aa C42:1 | PC aa C42:2 | PC aa C42:4 | PC aa C42:5 |
| PC aa C42:6 | PC ae C30:0 | PC ae C30:1 | PC ae C32:1 | PC ae C32:2 |
| PC ae C34:0 | PC ae C34:1 | PC ae C34:2 | PC ae C34:3 | PC ae C36:0 |
| PC ae C36:1 | PC ae C36:2 | PC ae C36:3 | PC ae C36:4 | PC ae C36:5 |
| PC ae C38:0 | PC ae C38:1 | PC ae C38:2 | PC ae C38:3 | PC ae C38:4 |
| PC ae C38:5 | PC ae C38:6 | PC ae C40:1 | PC ae C40:2 | PC ae C40:3 |
| PC ae C40:4 | PC ae C40:5 | PC ae C40:6 | PC ae C42:1 | PC ae C42:2 |
| PC ae C42:3 | PC ae C42:4 | PC ae C42:5 | PC ae C44:3 | PC ae C44:4 |
| PC ae C44:5 | PC ae C44:6 |  |  |  |
| **Sphingophospholipids** | | | | |
| SM (OH) C14:1 | SM (OH) C16:1 | SM (OH) C22:1 | SM (OH) C22:2 | SM (OH) C24:1 |
| SM C16:0 | SM C16:1 | SM C18:0 | SM C18:1 | SM C20:2 |
| SM C24:0 | SM C24:1 | SM C26:0 | SM C26:1 |  |
| **Monosaccharides** | | | | |
| H1 | | | | |
